# Supplementary material
Source: MDPI journal article supplement (https://www.mdpi.com/2072-4292/15/4/1007)
Supplement: s1 [file s1]

**Table S1** Spatial relationship between conditioning factors and historical landslides using frequency ratio method

| Factors              | Subclass         | Pixels<br>in<br>Domain | Percentage of<br>Domain (%) | Pixels<br>with<br>Landslide | Percentage of<br>Landslides<br>(%) | FR<br>Value |
|----------------------|------------------|------------------------|-----------------------------|-----------------------------|------------------------------------|-------------|
| Elevation<br>(m)     | 516–700          | 41042                  | 1.56                        | 42                          | 35.59                              | 22.86       |
|                      | 700–900          | 199578                 | 7.57                        | 28                          | 23.73                              | 3.13        |
|                      | 900–1100         | 457802                 | 17.36                       | 28                          | 23.73                              | 1.37        |
|                      | 1100–1300        | 669439                 | 25.39                       | 11                          | 9.32                               | 0.37        |
|                      | 1300–1500        | 616496                 | 23.38                       | 9                           | 7.63                               | 0.33        |
|                      | 1500–1700        | 364727                 | 13.83                       | 0                           | 0.00                               | 0.00        |
|                      | 1700–1900        | 170949                 | 6.48                        | 0                           | 0.00                               | 0.00        |
|                      | 1900–2100        | 75400                  | 2.86                        | 0                           | 0.00                               | 0.00        |
|                      | 2100–2300        | 28293                  | 1.07                        | 0                           | 0.00                               | 0.00        |
|                      | 2300–2500        | 10311                  | 0.39                        | 0                           | 0.00                               | 0.00        |
|                      | 2500–2763        | 2485                   | 0.09                        | 0                           | 0.00                               | 0.00        |
| Slope (°)            | 0–10             | 134147                 | 5.09                        | 21                          | 17.80                              | 3.50        |
|                      | 10–20            | 488228                 | 18.52                       | 36                          | 30.51                              | 1.65        |
|                      | 20–30            | 927360                 | 35.17                       | 32                          | 27.12                              | 0.77        |
|                      | 30–40            | 794942                 | 30.15                       | 23                          | 19.49                              | 0.65        |
|                      | 40–50            | 269518                 | 10.22                       | 3                           | 2.54                               | 0.25        |
|                      | 50–60            | 21531                  | 0.82                        | 3                           | 2.54                               | 3.11        |
|                      | 60–70            | 777                    | 0.03                        | 0                           | 0.00                               | 0.00        |
|                      | 70–74            | 19                     | 0.00                        | 0                           | 0.00                               | 0.00        |
| Aspect               | Flat             | 162829                 | 6.18                        | 7                           | 5.93                               | 0.96        |
|                      | North            | 295253                 | 11.20                       | 18                          | 15.25                              | 1.36        |
|                      | Northeast        | 355388                 | 13.48                       | 14                          | 11.86                              | 0.88        |
|                      | East             | 376859                 | 14.29                       | 20                          | 16.95                              | 1.19        |
|                      | Southeast        | 306409                 | 11.62                       | 22                          | 18.64                              | 1.60        |
|                      | South            | 321254                 | 12.18                       | 10                          | 8.47                               | 0.70        |
|                      | Southwest        | 338043                 | 12.82                       | 17                          | 14.41                              | 1.12        |
|                      | West             | 318849                 | 12.09                       | 5                           | 4.24                               | 0.35        |
|                      | Northwest        | 161638                 | 6.13                        | 5                           | 4.24                               | 0.69        |
| Profile<br>curvature | (-18.33)–(-1.87) | 142896                 | 5.42                        | 6                           | 5.08                               | 0.94        |
|                      | (-1.87)–(-0.68)  | 411616                 | 15.61                       | 12                          | 10.17                              | 0.65        |
|                      | (-0.68)–0.36     | 1218102                | 46.20                       | 50                          | 42.37                              | 0.92        |
|                      | 0.36–1.54        | 640304                 | 24.29                       | 39                          | 33.05                              | 1.36        |
|                      | 1.54–19.48       | 223604                 | 8.48                        | 11                          | 9.32                               | 1.10        |
| Plan<br>curvature    | (-11.48)–(-1.30) | 125001                 | 4.74                        | 7                           | 5.93                               | 1.25        |
|                      | (-1.30)–(-0.45)  | 494413                 | 18.75                       | 20                          | 16.95                              | 0.90        |
|                      | (-0.45)–0.19     | 989608                 | 37.53                       | 58                          | 49.15                              | 1.31        |
|                      | 0.19–1.04        | 801472                 | 30.40                       | 25                          | 21.19                              | 0.70        |
|                      | 1.04–15.57       | 226028                 | 8.57                        | 8                           | 6.78                               | 0.79        |

|                              |              |         |       |    |       |       |
|------------------------------|--------------|---------|-------|----|-------|-------|
| TWI                          | 1.41–6       | 2009107 | 76.20 | 55 | 46.61 | 0.61  |
|                              | 6–9          | 481244  | 18.25 | 42 | 35.59 | 1.95  |
|                              | 9–12         | 95883   | 3.64  | 8  | 6.78  | 1.86  |
|                              | 12–15        | 29612   | 1.12  | 7  | 5.93  | 5.28  |
|                              | 15–23.74     | 20676   | 0.78  | 6  | 5.08  | 6.48  |
| SPI                          | 0–20         | 29795   | 1.13  | 10 | 8.47  | 7.50  |
|                              | 20–40        | 6605    | 0.25  | 2  | 1.69  | 6.77  |
|                              | 40–60        | 9282    | 0.35  | 1  | 0.85  | 2.41  |
|                              | 60–80        | 8520    | 0.32  | 6  | 5.08  | 15.73 |
|                              | >80          | 2582320 | 97.94 | 99 | 83.90 | 0.86  |
| STI                          | 0–10         | 1467316 | 55.65 | 82 | 69.49 | 1.25  |
|                              | 10–20        | 1148396 | 43.56 | 36 | 30.51 | 0.70  |
|                              | 20–30        | 19775   | 0.75  | 0  | 0.00  | 0.00  |
|                              | 30–40        | 841     | 0.03  | 0  | 0.00  | 0.00  |
|                              | >40          | 194     | 0.01  | 0  | 0.00  | 0.00  |
| Distance<br>to faults<br>(m) | 0–200        | 156617  | 5.94  | 10 | 8.47  | 1.43  |
|                              | 200–400      | 146079  | 5.54  | 10 | 8.47  | 1.53  |
|                              | 400–600      | 135684  | 5.15  | 12 | 10.17 | 1.98  |
|                              | 600–800      | 125480  | 4.76  | 7  | 5.93  | 1.25  |
|                              | 800–1000     | 120777  | 4.58  | 3  | 2.54  | 0.55  |
|                              | >1000        | 1951885 | 74.03 | 76 | 64.41 | 0.87  |
| Distance<br>to roads<br>(m)  | 0–100        | 109972  | 4.17  | 20 | 16.95 | 4.06  |
|                              | 100–200      | 87562   | 3.32  | 14 | 11.86 | 3.57  |
|                              | 200–300      | 80964   | 3.07  | 10 | 8.47  | 2.76  |
|                              | 300–400      | 78210   | 2.97  | 3  | 2.54  | 0.86  |
|                              | 400–500      | 75275   | 2.86  | 1  | 0.85  | 0.30  |
|                              | >500         | 2204539 | 83.62 | 70 | 59.32 | 0.71  |
| Distance<br>to rivers<br>(m) | 0–100        | 423342  | 16.06 | 50 | 42.37 | 2.64  |
|                              | 100–200      | 380209  | 14.42 | 17 | 14.41 | 1.00  |
|                              | 200–300      | 348278  | 13.21 | 8  | 6.78  | 0.51  |
|                              | 300–400      | 308618  | 11.71 | 9  | 7.63  | 0.65  |
|                              | 400–500      | 253615  | 9.62  | 8  | 6.78  | 0.70  |
|                              | >500         | 922460  | 34.99 | 26 | 22.03 | 0.63  |
| NDVI                         | (-0.13)–0.28 | 57978   | 2.20  | 17 | 14.41 | 6.55  |
|                              | 0.28–0.41    | 175606  | 6.66  | 43 | 36.44 | 5.47  |
|                              | 0.41–0.48    | 539186  | 20.45 | 22 | 18.64 | 0.91  |
|                              | 0.48–0.54    | 1002348 | 38.02 | 23 | 19.49 | 0.51  |
|                              | 0.54–0.65    | 861404  | 32.67 | 13 | 11.02 | 0.34  |
| Rainfall<br>(mm/yr)          | 653–673      | 93654   | 3.55  | 0  | 0.00  | 0.00  |
|                              | 673–693      | 466030  | 17.68 | 5  | 4.24  | 0.24  |
|                              | 693–713      | 573189  | 21.74 | 32 | 27.12 | 1.25  |
|                              | 713–733      | 724650  | 27.49 | 47 | 39.83 | 1.45  |
|                              | 733–753      | 389002  | 14.75 | 15 | 12.71 | 0.86  |

|           |                                          |         |       |     |       |      |
|-----------|------------------------------------------|---------|-------|-----|-------|------|
|           | 753–764                                  | 389997  | 14.79 | 19  | 16.10 | 1.09 |
| Land use  | Farmland                                 | 531645  | 20.16 | 46  | 38.98 | 1.93 |
|           | Gardenland                               | 1231021 | 46.69 | 34  | 28.81 | 0.62 |
|           | Forestland                               | 861886  | 32.69 | 34  | 28.81 | 0.88 |
|           | Commerical land                          | 9889    | 0.38  | 4   | 3.39  | 9.04 |
|           | Industrial and<br>mining storage<br>land | 2081    | 0.08  | 0   | 0.00  | 0.00 |
| Lithology | Group 1                                  | 123884  | 4.70  | 1   | 0.85  | 0.18 |
|           | Group 2                                  | 639471  | 24.25 | 3   | 2.54  | 0.10 |
|           | Group 3                                  | 31452   | 1.19  | 2   | 1.69  | 1.42 |
|           | Group 4                                  | 1311573 | 49.75 | 111 | 93.22 | 1.89 |
|           | Group 5                                  | 4482    | 0.17  | 0   | 0.00  | 0.00 |
|           | Group 6                                  | 89099   | 3.38  | 0   | 0.00  | 0.00 |
|           | Group 7                                  | 21375   | 0.81  | 1   | 0.85  | 1.05 |
|           | Group 8                                  | 2655    | 0.10  | 0   | 0.00  | 0.00 |
|           | Group 9                                  | 10151   | 0.39  | 0   | 0.85  | 0.00 |
|           | Group 10                                 | 402380  | 15.26 | 0   | 0.00  | 0.00 |
